1           **Host genetic variation in feeding rate mediates a fecundity cost of parasite**  
2                                           **resistance in a *Daphnia*-parasite system**

3                                           **Author:** Stuart K.J.R. Auld\*<sup>1</sup>, Kätlin Raidma<sup>1,2</sup>

4           <sup>1</sup>Biological & Environmental Sciences, University of Stirling, Stirling, United Kingdom

5           <sup>2</sup>Department of Life Sciences, Aberystwyth University, Ceredigion, United Kingdom

6           \*Corresponding author

7           **Running title:** Non immunological cost of parasite resistance

8           **Keywords:** parasite transmission, host fecundity, resistance trade-off

9           **Article type:** Article

10          All data and code will be archived with Dryad upon acceptance of the manuscript.

11          **Correspondence address:** Room 3A149, Cottrell Building, University of Stirling,  
12          Stirling, FK9 4LA, UK. **Email:** [s.k.auld@stir.ac.uk](mailto:s.k.auld@stir.ac.uk). **Telephone:** +44 (0)1786 467857

13

14          **Summary statement:** Costs of *Daphnia* immunity to a sterilising bacterial parasite  
15          are mediated by feeding ecology and not immunity, and infection-induced anorexia  
16          can further alter the relative strength of parasitism and host-host competition.

17

18

19

20

21

22 **ABSTRACT**

23 Organisms face numerous challenges over their lifetimes, including from competitors and  
24 parasites, and experience selection to maximise their fitness in the face of these various  
25 pressures. However, selection can rarely maximise individual ability to cope with all  
26 challenges, and trade-offs therefore emerge. One such trade-off is the cost of resisting  
27 parasitic infection, whereby hosts that have a high intrinsic capacity to resist parasitic  
28 infection have comparatively low fitness in the absence of the parasite, and spatio-temporal  
29 variation in the relative strength of parasite- and non parasite-mediated selection is thought  
30 to maintain diversity in host resistance. Here, we test for, and find, a simple cost of  
31 resistance in the freshwater host *Daphnia magna* and its sterilising bacterial parasite,  
32 *Pasteuria ramosa* that is shaped by ecology as opposed to immunity. We uncovered  
33 significant genetic variation in *Daphnia* feeding rate, and show that rapid-feeding *Daphnia*  
34 genotypes have high fecundity in the absence of the parasite, but are more likely to go on to  
35 suffer sterilising infection when exposed to the parasite. This feeding rate-mediated cost of  
36 resistance can explain the persistence of parasite-susceptible genotypes. Further, we found  
37 evidence of infection induced anorexia in *Pasteuria*-infected hosts. It follows that reduced  
38 feeding in infected hosts means that high parasite prevalence could result in greater host  
39 food availability; this could reduce intra-specific competition and mask the cost of resistance  
40 in nature.

41

42

43

44

45

46

## 47 INTRODUCTION

48 Infectious disease is a key challenge for nearly all organisms, and fitness is commonly  
49 shaped, at least in part, by an individual's capacity to resist infection (Graham et al., 2011).  
50 Hosts have consequently evolved complex immune systems to identify infectious agents and  
51 coordinate immune effectors to destroy them (Frank, 2020). We know that fitness is only  
52 partly dependent on resistance because pathogen-susceptible genotypes persist in many  
53 host populations, and this strongly suggests that maintaining immune machinery comes at a  
54 cost to other fitness traits. Such costs could be energetic, or in the form of collateral damage  
55 of immune responses, or in some cases, increased susceptibility to an alternative pathogen  
56 species or even alternative genotype of the same pathogen species) (Graham et al., 2011;  
57 Schmid Hempel and Ebert, 2003; Sheldon and Verhulst, 1996). Although these constitutive  
58 costs of resistance are expected, there are many systems where they are either elusive, or  
59 only occur under very specific circumstances (see Labbé et al., 2010). For example,  
60 parasitoid-resistant *Drosophila melanogaster* have reduced larval competitive ability, but  
61 only when food is scarce (Fellowes et al., 1998; Kraaijeveld and Godfray, 1997), and whilst  
62 poultry selected for increased overall immunocompetence evolved reduced body mass, it  
63 was not the case that poultry selected for increased body mass suffered reduced  
64 immunocompetence (van der Most et al., 2011). What can explain the missing costs of  
65 resistance?

66 Resistance is not solely determined by the immune system, and experiments designed to  
67 target the effects of immunologically-driven resistance often eliminate variation in ecological  
68 conditions that make a larger contribution to anti-parasite defences (Lazzaro and Little,  
69 2009). It follows that if we are understand the costs of resistance in more natural settings, we  
70 have to examine host genetic variation in non-immunological, and sometimes less obvious  
71 anti-infection mechanisms (Auld et al., 2013). For example, feeding rate is an obvious fitness  
72 trait that is also associated with exposure to environmentally-transmitted parasites. It has  
73 long been known that organisms that have high feeding rates will be successful inter- and

74 intra-specific competitors and enjoy relatively high fitness due to their ability to acquire more  
75 resources (Burnet et al., 1977; Galimany et al., 2017). However, in environments where  
76 environmentally-transmitted parasites are either common or virulent, rapid feeders could pay  
77 a fitness cost in that they are more likely to encounter infectious parasite transmission  
78 stages and suffer the fitness implications of disease (Auld et al., 2013). Theory tells us that  
79 this simple trade-off tell us about the relative strength of competition and parasitism as  
80 ecological forces of selection, and could potentially explain the persistence of parasite-  
81 susceptible genotypes (Hall et al., 2010; Walsman et al., 2022); indeed, when competition is  
82 particularly strong, rapid feeding and higher susceptibility can be favoured by selection even  
83 when parasites are prevalent.

84 In many host-parasite systems, matters are further complicated by the fact that infected  
85 hosts suffer altered feeding rates. Infection induced anorexia is common and in some cases  
86 adaptive for the host (see (Ayres and Schneider, 2009). and references within). Moreover, in  
87 systems where infection induced anorexia occurs, an increase in parasite prevalence can  
88 result in greater food availability for the uninfected fraction of the host population, thus  
89 reducing intra-specific competition and potentially mitigating any cost of resistance  
90 (Walsman et al., 2022).

91 In this study, we used the crustacean *Daphnia magna* and its environmentally-transmitted  
92 sterilising bacterial parasite, *Pasteuria ramosa*, to test the following hypotheses: (1) genetic  
93 variation in *Daphnia* feeding rate is positively associated with in the absence of infection; (2)  
94 genetic variation in *Daphnia* feeding rate is also negatively associated with likelihood of  
95 suffering infection by *Pasteuria*; and (3) that feeding-rate is reduced in *Pasteuria*-infected  
96 *Daphnia*.

97

## 98 **MATERIALS AND METHODS**

99 *Study system*

100 The host, *Daphnia magna* is a common freshwater crustacean that inhabits shallow ponds  
101 throughout Europe. *Daphnia* are filter-feeders that graze on algae, but they also frequently  
102 ingest spores of horizontally-transmitted parasites, such as the bacterium *Pasteuria ramosa*  
103 (Auld, 2014; Ebert, 2008). After ingestion, *Pasteuria* spores bind to and then penetrate the  
104 *Daphnia* oesophagus (Duneau et al., 2011); after sporulation, the parasite undergoes a 10-  
105 20 day developmental process, and many millions of transmission spores are then released  
106 after host death (Ebert et al., 1996). The process of parasite within-host growth and  
107 development is very costly to the host, and infection commonly results in complete castration  
108 (Cressler et al., 2014; Ebert et al., 2004).

109 We conducted a suite of experiments to test the relationships between host feeding rates,  
110 host fecundity in the absence of infection and susceptibility to infection across 16 *Daphnia*  
111 genotypes (=clones). Host genotype lines were established from single individuals taken  
112 from 16 different experimental ponds at the University of Stirling (the Stirling Outdoor  
113 Disease Experiment; see Auld and Brand, 2017). These ponds were all initiated with the  
114 same suite of 12 *Daphnia* genotypes in 2015 (originally from Kaimes Farm, Leitholm,  
115 Scottish Borders (2°20'43"W, 55°42'15"N)), but the multiple rounds of sexual reproduction  
116 and thus genetic recombination means we are certain that *Daphnia* harvested from differing  
117 ponds are genetically distinct. The *Pasteuria* population we used comprised of a diverse mix  
118 of multiple isolates from the same original population as the *Daphnia*.

119 We maintained three replicate maternal lines for each of our *Daphnia* genotypes (a total of  
120 48 maternal lines). Each replicate line was established with eight neonate (<24h old)  
121 *Daphnia* in jars containing 200mL of artificial *Daphnia* medium (ADaM: Klüttgen et al., 1994,  
122 modified using 5% of the recommended SeO<sub>2</sub> concentration; Ebert et al., 1998). Each  
123 replicate line was fed 8 ABS of *Chlorella vulgaris* algal cells per day (where ABS is the  
124 optical absorbance of 650nm white light by the *Chlorella* culture). *Daphnia* medium was  
125 changed twice per week, or after the *Daphnia* produced offspring (the offspring were

126 discarded). Maternal lines were maintained for three generations to minimise any variation  
127 due to maternal effects; the second and third generations were established using 2<sup>nd</sup>-3<sup>rd</sup>  
128 clutch offspring. Experimental replicates were established using 2<sup>nd</sup>-4<sup>th</sup> clutch offspring from  
129 each maternal line.

#### 130 *Experimental 1: Genetic variation in feeding rate and fecundity*

131 From each replicate maternal line, neonate (<24h old) offspring were harvested and  
132 allocated to experimental jars on day zero. All experimental jars contained 8 *Daphnia* in  
133 200mL artificial *Daphnia* media (identical to the maternal lines), and were fed 8 ABS  
134 *Chlorella* algal cells per day and had media refreshed on day three.

135 On day six, a feeding rate assay was conducted. Media was refreshed and each  
136 experimental jar was fed 8 ABS *Chlorella* algal cells; the algae and media was thoroughly  
137 mixed with a plastic coffee stirrer (one per jar). An additional eight jars containing no  
138 *Daphnia* were also setup (and were fed the same algae and stirred also). A 1.5mL sample of  
139 the media was then taken and the optical absorbance was determined from each jar  
140 immediately after stirring (0 minutes), and then at 30, 60 and 120 minutes. Thus, we  
141 quantified algal densities over time in media *Daphnia*, and in media with no *Daphnia*.  
142 Immediately after the assay was completed, media was once again refreshed and *Daphnia*  
143 were fed 8 ABS *Chlorella* cells per day.

144 On days 8, 10, 12, and 16, the number of surviving adults and number of offspring were  
145 recorded in each jar; the offspring were then discarded, media refreshed, and the jars were  
146 fed 8 ABS per day.

#### 147 *Experiment 2: Infection and feeding rate across genotypes*

148 Experimental protocol was similar to that of Experiment 1. From each replicate maternal line,  
149 neonate (<24h old) offspring were harvested and allocated to experimental jars on day zero.  
150 All experimental jars contained 8 *Daphnia* in 200mL artificial *Daphnia* media (identical to the

151 maternal lines). All jars received a dose of  $1 \times 10^5$  (50 $\mu$ L) *Pasteuria* transmission spores  
152 (comprising homogenized, previously infected *Daphnia* diluted in ddH<sub>2</sub>O). All replicate jars  
153 were fed 2 ABS *Chlorella* algal cells per day for a three-day (72h) exposure period. After the  
154 exposure period (day four), replicates were changed into new jars with fresh media and fed 8  
155 ABS *Chlorella* algal cells per day. On day six, a feeding rate assay was conducted in a  
156 similar manner to that described for Experiment 1, except that the optical absorbance of  
157 media was determined at two time points: 0 and 120 minutes.

158 On days 8, 10, 12, and 16, media was refreshed and offspring were then discarded from  
159 each jar; the jars were then fed 8 ABS per day. On day 20, the number of *Pasteuria*-infected  
160 *Daphnia* within each jar was recorded (infected hosts are larger than their uninfected  
161 counterparts, red brown in colour and have an empty brood chamber due to parasite-  
162 induced castration). We then conducted a second feeding assay. All animals were placed  
163 into fresh jars and fed 8 ABS *Chlorella* algal cells following the protocol described previously  
164 and the optical absorbance of the media was determined at 0 and 120 minutes. Again, an  
165 additional eight jars containing no *Daphnia* were also setup (and were fed the same algae  
166 and stirred also) as controls.

## 167 *Analysis*

168 Experiment 1 data were analysed as follows. We first tested whether algal density declined  
169 over time in the no-*Daphnia* (control) jars. This was done using a simple linear model fitted  
170 to control jar absorbance data, where sample time was fitted as a covariate. We then  
171 confirmed that the initial algal absorbance (*i.e.*, at time=0h) was the same across all  
172 genotypes and controls. This was done by fitting a linear model to data from both control and  
173 *Daphnia* samples, with genotype (genotype ID, or no-*Daphnia*) fitted as a fixed factor.

174 Next, we tested for genotypic variation in *Daphnia* feeding over time (excluding the no  
175 *Daphnia* control treatment). We did this by subtracting the absorbance at t=60 and t=120  
176 from absorbance at t=0 for each jar; we then divided by 8 (the number of *Daphnia* per jar) to

177 convert the value from being loss of algae in the media to being the cumulative absorbance  
178 of algae consumed per *Daphnia*. Next, we fitted a linear model to these feeding data,  
179 including genotype ID, sample time and their interaction as fixed effects.

180 Experiment 2 data were analysed in a similar manner to the data from experiment 1. For  
181 both the Day 6 and Day 20 feeding rate assays, we confirmed that the initial algal  
182 absorbance (*i.e.*, at time=0h) was the same across all genotypes and controls, and was  
183 unaffected by future proportion of hosts that suffered infection. This was done to confirm the  
184 assay methods were appropriate.

185 Using the Day 6 feeding rate assay data, we then tested the hypothesis that *Daphnia* early  
186 feeding rate was associated with an increased likelihood of them becoming infected; we also  
187 tested if susceptibility to infection varied across *Daphnia* genotypes. We did this by fitting a  
188 generalized linear model to the number of infected and healthy *Daphnia* on day 20, with *per*  
189 *capita* feeding rate and genotype ID fitted as fixed factors; a binomial error distribution was  
190 included in the model. Our final analysis was to test the hypothesis that infection status had  
191 an impact on feeding rate. This was done using a simple linear model fitted to the feeding  
192 rate data, where proportion of infected hosts was fitted as a covariate and genotype ID a  
193 fixed factor.

194

## 195 **RESULTS**

### 196 *Experiment 1: Genetic variation in feeding rate and fecundity*

197 We found no significant decline in the *C. vulgaris* absorbance over time in control (no-  
198 *Daphnia*) jars (linear model (LM): intercept =  $1.063 \times 10^{-3}$ , slope =  $4.137 \times 10^{-5}$ ,  $F_{1,22} = 2.45$ ,  $P$   
199 = 0.13; Fig. S1A). There was also no significant variation in initial (t=0) absorbance among  
200 control (*i.e.*, no *Daphnia*) and all 16 genotype treatments (LM:  $F_{15,40} = 0.49$ ,  $P = 0.93$ ; Fig.  
201 S1B). We found that *Daphnia* consumed a mean of  $3.55 \times 10^{-3} \pm 0.21 \times 10^{-3}$  (standard error)



202 ABS *C. vulgaris* cells *per capita* over 120 minutes. Cumulative consumption of food  
203 increased over time (effect of time, LM:  $F_{1,112} = 259.07$ ,  $P < 0.0001$ , 55% variation explained)  
204 and there was genetic variation in food consumed (effect of genotype ID, LM:  $F_{15,112} = 4.27$ ,  
205  $P < 0.0001$ , 14% of variation explained); cumulative consumption also varied according to  
206 genotype (effect of a time x genotype ID interaction, LM  $F_{15,112} = 2.49$ ,  $P = 0.003$ , 8% of  
207 variation explained; Fig. 1A), thus demonstrating limited but nonetheless significant genetic  
208 variation in the profile of *Daphnia per capita* feeding rate. We also uncovered significant  
209 genetic variation for *Daphnia* early reproductive rate (effect of genotype ID, LM:  $F_{15,224} =$   
210 6.84,  $P < 0.0001$ , Fig. 1B). Finally, we found a significant positive relationship between host  
211 feeding rate (the slope of *Daphnia per capita* cumulative feeding over time) and *Daphnia*

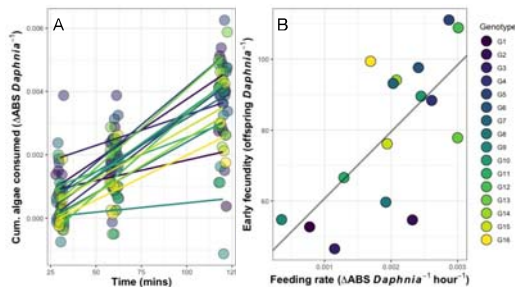

algae  
ty

214 *Experiment 2: Infection is a consequence and cause of variation in feeding rates*

215 On day 6, there was no significant variation in initial (t=0) absorbance among control (*i.e.*, no  
216 *Daphnia*) and all 16 genotype treatments (LM:  $F_{16,38} = 0.39$ ,  $P = 0.98$ ; Fig. S2A), nor was  
217 there variation in initial absorbance according to the proportion of *Daphnia* in each jar that  
218 went on to suffer infection (LM:  $F_{1,38} = 0.23$ ,  $P = 0.63$ ; Fig. S2B). When we analysed algal  
219 consumption data from jars that contained *Daphnia*, we found that average *per capita*  
220 feeding rate was positively associated with the proportion of *Daphnia* that went on to suffer

221 infection (effect of proportion infected, GLM:  $\chi^2_1 = 18.94$ ,  $P < 0.0001$ ; Fig. 2A) and varied  
222 according to *Daphnia* genotype (effect of genotype ID, GLM:  $\chi^2_{15} = 24.86$ ,  $P = 0.007$ ; Fig.

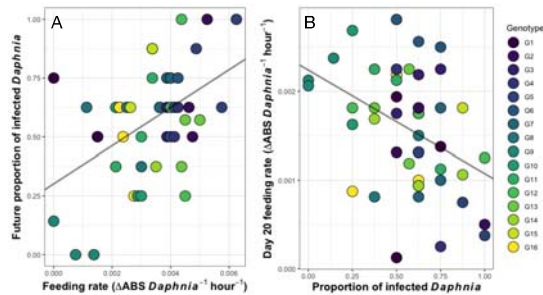

nia

224

225 On day 20, there was no significant variation in initial ( $t=0$ ) absorbance among control (*i.e.*,  
226 no *Daphnia*) and all 16 genotype treatments (LM:  $F_{16,38} = 1.11$ ,  $P = 0.38$ ; Fig. S2C), nor was  
227 there variation in initial absorbance according to the proportion of *Daphnia* in each jar that  
228 went on to suffer infection (LM:  $F_{1,38} = 0.05$ ,  $P = 0.82$ ; Fig. S2D). We did find that infection  
229 status had a strong impact on feeding rate in parasite-exposed replicates: mean *per capita*  
230 *Daphnia* feeding rate decreased with an increasing proportion of infected animals (effect of  
231 proportion infected *Daphnia*, LM:  $F_{1,31} = 11.28$ ,  $P = 0.002$ ; Fig. 2B), though there was now no  
232 significant variation in *Daphnia per capita* feeding rate according to genotype ID (effect of  
233 genotype ID, LM:  $F_{15,31} = 1.66$ ,  $P = 0.12$ ).

234

## 235 DISCUSSION

236 Numerous studies have evaluated the costs of evolving and maintaining strong immune  
237 defences, and often either found none, or else found such costs under specific conditions  
238 (see Labbé et al., 2010 for a review). We tested for a simple non-immunological constitutive

239 cost of resistance in the *Daphnia-Pasteuria* freshwater host-parasite system. Specifically,  
240 using two controlled laboratory experiments undertaken with sixteen genotypes of *Daphnia*  
241 and a mixed population of *Pasteuria* spores, we tested if host genetic variation in feeding  
242 rate mediated a fitness cost of resistance, and if there was evidence for reduced feeding in  
243 infected hosts, consistent with infection induced anorexia (Ayres and Schneider, 2009).

244 We found that algal densities declined over time in the presence of *Daphnia*, and that there  
245 was no significant decline in control replicates (where *Daphnia* were absent), thus  
246 demonstrating that *Daphnia* consume the algae. We uncovered significant genetic variation  
247 algal consumption, and that there was more limited (but nonetheless significant) genetic  
248 variation in feeding profiles over time: some genotypes slowed their consumption whilst  
249 others increased their feeding rate. Still, it is important to note that genetic variation in  
250 feeding rate profile accounted for a small proportion of the variation in the data compared to  
251 overall genotype variation in consumption, and this is supported by the limited changes in  
252 the rank order of genotypes over time. We therefore argue that 120 minute feeding rate is a  
253 useful measure to compare across *Daphnia* genotypes.

254 This variation in feeding rate was found to have important consequences for *Daphnia* fitness  
255 in the absence of infection. Not only did we uncover significant genetic variation for *Daphnia*  
256 early fecundity, we also found that early fecundity was strongly positively associated with  
257 feeding rate. Genotypes that rapidly filtered algae over a two hour period produced more  
258 than twice as many offspring than their slow feeding counterparts. All else being equal, rapid  
259 feeding genotypes would sequester the most resources, produce the most offspring and  
260 increase in relative frequency; rapid feeders would thus swiftly dominate populations on  
261 account of their intra-specific competitive ability.

262 However, results from our second experiment demonstrated that all else is not equal: we  
263 found that in the presence of the *Pasteuria* parasite, *Daphnia* genotypes with the greatest  
264 feeding rate were also most likely to go on to suffer infection. The most likely candidate

265 explanation for this is that rapid feeding host genotypes have the greatest contact rate with  
266 *Pasteuria* transmission spores and would thus be exposed to a greater effective parasite  
267 dose rate. The cost of resistance is not a cost of immunity as is often expected, but a cost in  
268 terms of increased host exposure to parasite infectious stages. In the *Daphnia-Pasteuria*  
269 system, the probability of infection depends on the precise combination of host and parasite  
270 genotypes (Luijckx et al., 2011). Still, in natural environments *Daphnia* would encounter  
271 multiple *Pasteuria* genotypes, and experiencing a greater dose rate would therefore increase  
272 the likelihood the *Daphnia* encounter a *Pasteuria* spore that genotypically matches and  
273 causes infection (Ben Ami et al., 2008). Thus, in environments where *Pasteuria* transmission  
274 stages were abundant, the fitness advantage benefits with greater resource acquisition  
275 would be rapidly overshadowed with the massive fitness cost of suffering infection with a  
276 sterilising parasite; parasitism would come to outweigh competition as the dominant  
277 ecological force.

278 Finally, we found that replicate jars containing a greater proportion of *Daphnia* with  
279 established infections had a lower *per capita* feeding rate. This provides compelling  
280 evidence for *Pasteuria* induced anorexia in *Daphnia*. In many ways, this is surprising.  
281 Previous work has demonstrated that both *Daphnia* and *Pasteuria* are resource limited, and  
282 that *Pasteuria* infection causes gigantism in its castrated hosts. It was argued that this  
283 gigantism was likely an adaptive parasite trait to sequester host resources for *Pasteuria*  
284 reproductive potential (Ebert et al., 2004). Put simply: *Pasteuria* steals future *Daphnia*  
285 offspring to fuel parasite spore production. However, infection induced anorexia could act  
286 counter to this. One explanation could be that *Daphnia* reduce their feeding rate upon  
287 infection in order to modulate their own life history in ways to mitigate the (massive) costs of  
288 infection. Infection induced anorexia could be the mark of the infected host shifting resource  
289 allocation away from survival/maintenance towards producing offspring more rapidly before  
290 castration is completed (termed fecundity compensation). Indeed, we observe fecundity  
291 compensation in multiple systems (Barribeau et al., 2010; Thornhill et al., 1986), including

292 *Daphnia*-parasite systems (Chadwick and Little, 2005; Vale and Little, 2012). For *Daphnia*-  
293 *Pasteuria* interactions, fecundity compensation is viewed as a form of tolerance (as opposed  
294 to resistance) because it maintains host fitness without reducing the within-host parasite  
295 burden.

296 Infection induced anorexia could also have broader ecological consequences. The reduced  
297 food consumption in infected *Daphnia* means that increases in parasite prevalence could  
298 result in relaxed competition among host genotypes (including slow-feeding parasite  
299 resistant genotypes), thus masking the feeding cost of resistance. However, these  
300 hypothetical scenarios are, by their very nature, speculative and require rigorous testing  
301 under ecologically complex conditions. Similarly, we must also acknowledge that other  
302 factors affect *Daphnia* feeding rate: in the related *Daphnia dentifera* host, switching to a low  
303 quality food resulted in a reduced feeding rate, slower growth and reduced susceptibility to  
304 the *Metschnikowia bicuspidata* yeast parasite (Penczykowski et al., 2014). Nevertheless, it is  
305 clear that host feeding rate can be instrumental as both a cause and a consequence of  
306 parasitic infection.

307 **Acknowledgements:** We thank NERC Iapetus2 for funding a Research Experience  
308 Placement to support KR.

309 **Author contributions:** SKJRA conceived of the study; SKJRA and KR collected and  
310 analysed the data; SKJRA and KR wrote the manuscript. Both authors approved the final  
311 version of the manuscript.

312 **Conflicts of interest:** The authors declare no conflicts of interest

313 **Data availability statement:** All data will be archived on Dryad upon acceptance of the  
314 manuscript.

## 315 REFERENCES

316 **Auld, S. K. J. R.** (2014). Immunology and Immunity. In *Physiology of the Cladocera* (ed. Smirnov, N.  
317 N., p. 352. London: Academic Press.

- 318 **Auld, S. K. J. R. and Brand, J.** (2017). Simulated climate change, epidemic size, and host evolution  
319 across host–parasite populations. *Global Change Biology*.
- 320 **Auld, S. K. J. R., Penczykowski, R. M., Housley Ochs, J., Grippi, D. C., Hall, S. R. and Duffy, M. A.**  
321 (2013). Variation in costs of parasite resistance among natural host populations. *Journal of*  
322 *Evolutionary Biology* **26**, 2479–2486.
- 323 **Ayres, J. S. and Schneider, D. S.** (2009). The Role of Anorexia in Resistance and Tolerance to  
324 Infections in *Drosophila*. *PLOS Biol* **7**, e1000150.
- 325 **Barribeau, S. M., Sok, D. and Gerardo, N. M.** (2010). Aphid reproductive investment in response to  
326 mortality risks. *BMC Evolutionary Biology* **10**, 1–11.
- 327 **Ben Ami, F., Regoes, R. R. and Ebert, D.** (2008). A quantitative test of the relationship between  
328 parasite dose and infection probability across different host-parasite combinations. *Proc. R. Soc.*  
329 *B*.
- 330 **Burnet, B., Sewell, D. and Bos, M.** (1977). Genetic analysis of larval feeding behaviour in *Drosophila*  
331 *melanogaster*: II. Growth relations and competition between selected lines. *Genetical Research*  
332 **30**, 149–161.
- 333 **Chadwick, W. and Little, T. J.** (2005). A parasite-mediated life-history shift in *Daphnia magna*. *Proc.*  
334 *R. Soc. B* **272**, 505–509.
- 335 **Cressler, C. E., Nelson, W. A., Day, T. and McCauley, E.** (2014). Starvation reveals the cause of  
336 infection-induced castration and gigantism. *Proc. R. Soc. B* **281**, 20141087.
- 337 **Duneau, D., Luijckx, P., Ben Ami, F., Laforsch, C. and Ebert, D.** (2011). Resolving the infection  
338 process reveals striking differences in the contribution of environment, genetics and phylogeny  
339 to host-parasite interactions. *BMC Biology* **9**, 11.
- 340 **Ebert, D.** (2008). Host–parasite coevolution: Insights from the *Daphnia*–parasite model system.  
341 *Current Opinion in Microbiology* **11**, 290–301.
- 342 **Ebert, D., Joachim Carius, H., Little, T. and Decaestecker, E.** (2004). The Evolution of Virulence When  
343 Parasites Cause Host Castration and Gigantism. *Am Nat* **164**, S19–S32.
- 344 **Ebert, D., Rainey, P., Embley, T. M. and Scholz, D.** (1996). Development, life cycle, ultrastructure  
345 and phylogenetic position of *Pasteuria ramosa* Metchnikoff 1888: Rediscovery of an obligate  
346 endoparasite of *Daphnia magna* straus. *Phil. Trans. R. Soc. B* **351**, 1689–1701.
- 347 **Ebert, D., Zschokke-Rohringer, C. D. and Carius, H. J.** (1998). Within–and between–population  
348 variation for resistance of *Daphnia magna* to the bacterial endoparasite *Pasteuria ramosa*. *Proc.*  
349 *R. Soc. B* **265**, 2127–2134.
- 350 **Fellowes, M. D. E., Kraaijeveld, A. R. and Godfray, H. C. J.** (1998). Tradeoff associated with selection  
351 for increased ability to resist parasitoid attack in *Drosophila melanogaster*. *Proceedings of the*  
352 *Royal Society of London. Series B: Biological Sciences*.
- 353 **Frank, S. A.** (2020). *Immunology and Evolution of Infectious Disease*. Princeton University Press.

- 354 **Galimany, E., Freeman, C. J., Lunt, J., Domingos, A., Sacks, P. and Walters, L.** (2017). Feeding  
355 competition between the native oyster *Crassostrea virginica* and the invasive mussel *Mytella*  
356 *charruana*. *Marine Ecology Progress Series* **564**, 57–66.
- 357 **Graham, A. L., Shuker, D. M., Pollitt, L. C., Auld, S. K. J. R., Wilson, A. J. and Little, T. J.** (2011).  
358 Fitness consequences of immune responses: strengthening the empirical framework for  
359 ecoimmunology. *Functional Ecology* **25**, 5–17.
- 360 **Hall, S. R., Becker, C. R., Duffy, M. A. and Cáceres, C. E.** (2010). Variation in Resource Acquisition and  
361 Use among Host Clones Creates Key Epidemiological Trade-Offs. *Am Nat.*
- 362 **Klüttgen, B., Dülmer, U., Engels, M. and Ratte, H. T.** (1994). ADaM, an artificial freshwater for the  
363 culture of zooplankton. *Water Research* **28**, 743–746.
- 364 **Kraaijeveld, A. R. and Godfray, H. C. J.** (1997). Trade-off between parasitoid resistance and larval  
365 competitive ability in *Drosophila melanogaster*. *Nature* **389**, 278–280.
- 366 **Labbé, P., Vale, P. F. and Little, T. J.** (2010). Successfully resisting a pathogen is rarely costly in  
367 *Daphnia magna*. *BMC Evolutionary Biology* **10**, 1–12.
- 368 **Lazzaro, B. P. and Little, T. J.** (2009). Immunity in a variable world. *Phil. Trans. R. Soc. B* **364**, 15–26.
- 369 **Luijckx, P., Ben Ami, F., Mouton, L., Pasquier, Du, L. and Ebert, D.** (2011). Cloning of the  
370 unculturable parasite *Pasteuria ramosa* and its *Daphnia* host reveals extreme genotype–  
371 genotype interactions. *Ecology Letters* **14**, 125–131.
- 372 **Penczykowski, R. M., Lemanski, B. C. P., Sieg, R. D., Hall, S. R., Ochs, J. H., Kubanek, J. and Duffy, M.**  
373 **A.** (2014). Poor resource quality lowers transmission potential by changing foraging behaviour.  
374 *Functional Ecology* **28**, 1245–1255.
- 375 **Schmid Hempel, P. and Ebert, D.** (2003). On the evolutionary ecology of specific immune defence.  
376 *Trends in Ecology & Evolution* **18**, 27–32.
- 377 **Sheldon, B. C. and Verhulst, S.** (1996). Ecological immunology: costly parasite defences and trade-  
378 offs in evolutionary ecology. *Trends in Ecology & Evolution* **11**, 317–321.
- 379 **Thornhill, J. A., Jones, J. T. and Kusel, J. R.** (1986). Increased oviposition and growth in immature  
380 *Biomphalaria glabrata* after exposure to *Schistosoma mansoni*. *Parasitology* **93**, 443–450.
- 381 **Vale, P. F. and Little, T. J.** (2012). Fecundity compensation and tolerance to a sterilizing pathogen in  
382 *Daphnia*. *Journal of Evolutionary Biology* **25**, 1888–1896.
- 383 **van der Most, P. J., de Jong, B., Parmentier, H. K. and Verhulst, S.** (2011). Trade-off between growth  
384 and immune function: a meta-analysis of selection experiments. *Functional Ecology* **25**, 74–80.
- 385 **Walsman, J. C., Strauss, A. T., Hite, J. L., Shocket, M. S. and Hall, S. R.** (2022). A paradox of parasite  
386 resistance: disease-driven trophic cascades increase the cost of resistance, selecting for lower  
387 resistance with parasites than without them. *Evol Ecol* 1–22.
- 388

389

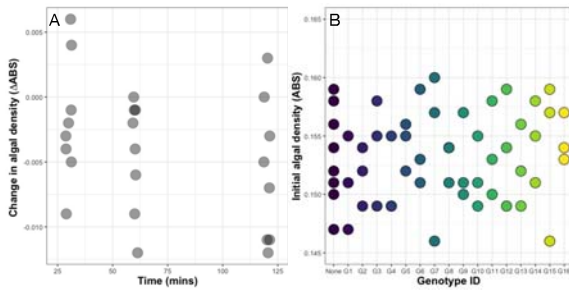

=

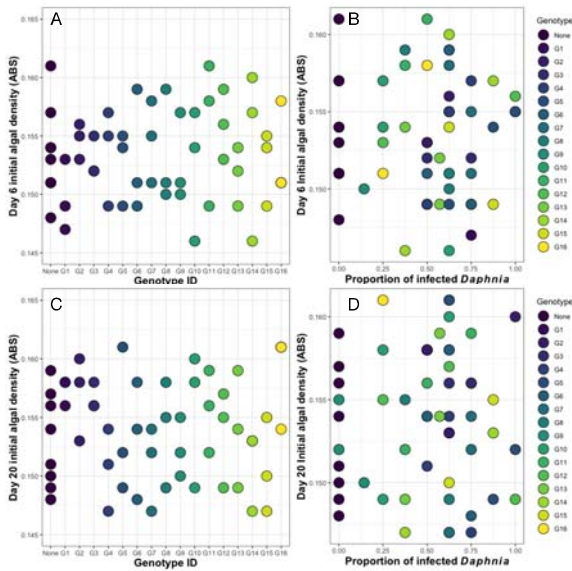

Figure S2. No variation in Day 6 initial *C. vulgaris* algal absorbance over 120 minutes **A** across control (*Daphnia* = “None”) and 16 genotypes, and **B** between proportion of hosts that became infected. Also no variation in Day 20 initial *C. vulgaris* algal absorbance over 120 minutes **C** across control (*Daphnia* = “None”) and 16 genotypes, and **D** between proportion of hosts that became infected.

392

393
